# Supplementary material for: The Medicago truncatula hydrolase MtCHIT5b degrades Nod factors of Sinorhizobium meliloti and cooperates with MtNFH1 to regulate the nodule symbiosis
Source: Front Plant Sci. 2022 Nov 17;13:1034230. doi: 10.3389/fpls.2022.1034230 (PMC9712974; doi:10.3389/fpls.2022.1034230)
Supplement: Supplementary file 2 [file DataSheet_2.xlsx]

## Sheet: Supplementary Table 1
Supplementary Tables 1-2
The Medicago truncatula hydrolase MtCHIT5b degrades Nod factors of Sinorhizobium meliloti and cooperates with MtNFH1 to regulate the nodule symbiosis
Ru-Jie Li, Chun-Xiao Zhang, Sheng-Yao Fan, Yi-Han Wang, Jiangqi Wen, Kirankumar S. Mysore, Zhi-Ping Xie and Christian Staehelin
SUPPLEMENTARY TABLE 1 Plasmids and strains used in this study.
Strain/plasmid	Relevant characteristicsa	Reference/sourceb	Used primer
Plasmids:
pET-28b	Expression vector based on pBR322; containing a 6 × His tag, Kmr	Novagen, Darmstadt, Germany
pET-MtCHIT5b	pET-28b derivative carrying a NdeI/XhoI fragment containing the coding region of MtCHIT5b without predicted signal peptide amplified from cDNA of M. truncatula R108, Kmr	Zhang et al., 2016
pET-MtNFH1	pET-28b derivative carrying a NdeI/XhoI fragment containing the coding region of MtNFH1 without predicted signal peptide amplified from cDNA of M. truncatula R108, Kmr	Zhang et al., 2016
pBBR1MCS-2	A broad-host-range gene expression vector compatible with IncP group plasmids, Kmr	Kovach et al., 1995
pHP45	A plasmid containing an Ω Spe interposon, Sper	Quandt and Hynes, 1993
pBBR1MCS-2-Spep-mCherry	pBBR1MCS-2 derivative carrying a XhoI/XbaI fragment (1 584-bp) containing the promoter region of Spe amplified from pHP45 (primers 1 and 2) and the PCR-amplified coding region of mCherry (primers 3 and 4), Kmr	This study	1, 2, 3, 4
pBBR1MCS-2-Spep-mTFP1	pBBR1MCS-2 derivative carrying a XhoI/XbaI fragment (1 584-bp) containing the promoter region of Spe amplified from pHP45 (primers 1 and 5) and the PCR-amplified coding region of mTFP1 (primers 6 and 7), Kmr	This study	1, 5, 6, 7
pCAMBIA1305	A binary vector for stable replication in Agrobacterium containing a 35S-GUS-polyA cassette, Kmr	http://www.cambia.org
pCAMBIA1305-MtCHIT5bp-GUS	pCAMBIA1305 derivative in which the CaMV 35S promoter was replaced by a BamHI/NcoI fragment (3 033-bp) containing the promoter region of MtCHIT5b amplified from genomic DNA of M. truncatula R108, Kmr	This study	8, 9
pCAMBIA1305-RFP	A pCAMBIA1305 derivative carrying a HindIII/HindIII fragment containing a 35S-RFP-polyA cassette, Kmr	Constructed by Chun-Lian Li, Sun Yat-sen University, Guangzhou, China
pCAMBIA1305-MtCHIT5bp-GUS+RFP	pCAMBIA1305-MtCHIT5bp-GUS derivative with a KpnI/KpnI fragment (1 332-bp) containing a 35S-RFP-polyA cassette amplified from pCAMBIA1305-RFP, Kmr	This study	10, 11
pCAMBIA1302	A binary vector for stable replication in Agrobacterium containing a 35S-GFP-Nos cassette, Kmr	http://www.cambia.org
pCAMBIA1302-MtCHIT5bp-GFP	pCAMBIA1302 derivative in which the CaMV 35S promoter was replaced by a BamHI/NcoI fragment (3 033-bp) containing the promoter region of MtCHIT5b amplified from genomic DNA of M. truncatula R108, Kmr	This study	8, 9
pCAMBIA1302-MtCHIT5bp-MtCHIT5b:GFP	pCAMBIA1302-MtCHIT5bp-GFP derivative with an NcoI/NcoI fragment (1 143-bp) containing MtCHIT5b coding sequence amplified from genomic DNA of M. truncatula R108, Kmr	This study	12, 13
pCAMBIA1302-MtCHIT5bp-MtCHIT5b:GFP+RFP	pCAMBIA1302-MtCHIT5bp-MtCHIT5b-GFP derivative with a KpnI/KpnI fragment (1 332-bp) containing a 35S-RFP-polyA cassette amplified from pCAMBIA1305-RFP, Kmr	This study	10, 11
pBS-RNAi	pBluescript II SK derivative, RNA interference vector with a 35S-spacer-polyA cassette, Ampr	Constructed by Wen-Hui Hu, Sun Yat-sen University, Guangzhou, China
pBS-RNAi-MtCHIT5b(+)	A pBS-RNAi derivative carrying an EcoRI/SmaI fragment (625-bp) containing a MtCHIT5b region in sense orientation amplified from genomic DNA of M. truncatula R108, Ampr	This study	14, 15
pBS-RNAi-MtCHIT5bi	A pBS-RNAi-MtCHIT5b(+) derivative carrying a BamHI/XbaI fragment (637-bp) containing a MtCHIT5b region in anti-sense orientation amplified from genomic DNA of M. truncatula R108, Ampr	This study	14, 15
pCAMBIA1305-MtCHIT5bi	A pCAMBIA1305 derivative carrying an HindIII/SacI fragment excised from pBS-RNAi-MtCHIT5bi, Kmr	This study
pCAMBIA1305-MtCHIT5bi+RFP	A pCAMBIA1305-MtCHIT5bi derivative carrying a HindIII/HindIII fragment (1 332-bp) containing a 35S-RFP-polyA cassette excised from pCAMBIA1305-RFP, Kmr	This study
pUB-GFP	A pBI121 derivative in which the 35S promoter was replaced by a Lotus japonicus Ubiquitin (Ljubq1) promoter followed by a Nos terminator for overexpression and a GFP expression cassette, Kmr	Maekawa et al., 2008
pUB-MtCHIT5b	A pUB-GFP derivative carrying a XbaI/KpnI fragment containing MtCHIT5b coding sequence (1 269-bp, amplified from genomic DNA of M. truncatula R108) between the L. japonicus Ubiquitin promoter and the Nos terminator, Kmr	This study	16, 17
pUB-MtCHIT5b:mCherry	A pUB-GFP derivative carrying a XbaI/KpnI fragment (1 977-bp) containing MtCHIT5b coding sequence (amplified from genomic DNA of M. truncatula R108, primers 16 and 18) fused to the mCherry coding sequence (amplified from pBBR1MCS-2-Spep-mCherry, primers 19 and 20) between the L. japonicus Ubiquitin promoter and the Nos terminator, Kmr	This study	16, 18, 19, 20
pCAMBIA1305-LjUbip-MtCHIT5b+RFP	A pCAMBIA1305-RFP derivative carrying a MtCHIT5b overexpression cassette (2 780-bp) amplified from pUB-MtCHIT5b, Kmr	This study	21, 22
pRK2013	Tra+ helper plasmid for mobilization into rhizobial strains, Kmr	Figurski and Helinski, 1979
Escherichia coli:
E. coli DH5α	supE44, ΔlacU169(φ80 lacZΔM15), hsdR17, recA1, gyrA96, thi-1, relA1	Invitrogen, Carlsbad, CA, USA
E. coli BL21 (DE3)	F-ompT hsdSB (rB-mB-) gal dcm (DE3)	Novagen, Madison, USA
Sinorhizobium meliloti:
Rm41	S. meliloti Rm41 original strain without antibiotic resistance (Hungarian isolate)
Rm41 Spe	S. meliloti Rm41 derivative, Sper	This study
Rm41-mCherry	S. meliloti Rm41 Spe derivative carrying pBBR1MCS-2-Spep-mCherry, Sper and Kmr	This study
Rm41-mTFP1	S. meliloti Rm41 Spe derivative carrying pBBR1MCS-2-Spep-mTFP1, Sper and Kmr	This study
Agrobacterium rhizogenes:
ARqua-1	Widely used for hairy root transformation, Strr	Quandt et al., 1993
ARqua-1 pCAMBIA1302	Strain ARqua-1 carrying pCAMBIA1302, Strr, Kmr	This study
ARqua-1 pCAMBIA1305-RFP	Strain ARqua-1 carrying pCAMBIA1305-RFP, Strr, Kmr	This study
ARqua-1 pCAMBIA1302-MtCHIT5bp-MtCHIT5b:GFP	Strain ARqua-1 carrying pCAMBIA1302-MtCHIT5bp-MtCHIT5b:GFP, Strr, Kmr	This study
ARqua-1 pCAMBIA1302-MtCHIT5bp-MtCHIT5b:GFP+RFP	Strain ARqua-1 carrying pCAMBIA1302-MtCHIT5bp-MtCHIT5b:GFP+RFP, Strr, Kmr	This study
ARqua-1 pCAMBIA1305-MtCHIT5bp-GUS+RFP	Strain ARqua-1 carrying pCAMBIA1305-MtCHIT5bp-GUS+RFP, Strr, Kmr	This study
ARqua-1 pCAMBIA1305-MtCHIT5bi+RFP	Strain ARqua-1 carrying pCAMBIA1305-MtCHIT5bi+RFP, Strr, Kmr	This study
ARqua-1 pUB-MtCHIT5b:mCherry	Strain ARqua-1 carrying pUB-MtCHIT5b:mCherry, Strr, Kmr	This study
ARqua-1 pCAMBIA1305-LjUbip-MtCHIT5b+RFP	Strain ARqua-1 carrying pCAMBIA1305-LjUbip-MtCHIT5b+RFP, Strr, Kmr	This study
a Ampr, Kmr, Tcr, Strr and Sper, resistance to ampicillin, kanamycin, tetracycline, streptomycin and spectinomycin, respectively.
b Primer sequences are listed in Supplementary Table 2.
References cited in Supplementary Table 1
Figurski, D.H., and Helinski, D.R. (1979). Replication of an origin-containing derivative of plasmid RK2 dependent on a plasmid function provided in trans. Proc. Natl. Acad. Sci. U. S. A. 76: 1648-1652. doi: 10.1073/pnas.76.4.1648
Kovach, M.E., Elzer, P.H., Hill, D.S., Robertson, G.T., Farris, M.A., Roop, R.M., and Peterson, K.M. (1995). Four new derivatives of the broad-host-range cloning vector pBBR1MCS, carrying different antibiotic-resistance cassettes. Gene 166: 175-176. doi: 10.1016/0378-1119(95)00584-1
Maekawa, T., Kusakabe, M., Shimoda, Y., Sato, S., Tabata, S., Murooka, Y., and Hayashi, M. (2008). Polyubiquitin promoter-based binary vectors for overexpression and gene silencing in Lotus japonicus. Mol. Plant Microbe Interact. 21: 375-382. doi: 10.1094/MPMI-21-4-0375
Quandt, H.J., Pühler, A., and Broer, I. (1993). Transgenic root nodules of Vicia hirsuta: a fast and efficient system for the study of gene expression in indeterminate-type nodules. Mol. Plant Microbe Interact. 6: 699-706. doi: 10.1094/MPMI-6-699
Quandt, J., and Hynes, M.F. (1993). Versatile suicide vectors which allow direct selection for gene replacement in Gram-negative bacteria. Gene 127: 15-21. doi: 10.1016/0378-1119(93)90611-6
Zhang, L.Y., Cai, J., Li, R.J., Liu, W., Wagner, C., Wong, K.B., Xie, Z.P., and Staehelin, C. (2016). A single amino acid substitution in a chitinase of the legume Medicago truncatula is sufficient to gain Nod-factor hydrolase activity. Open Biol. 6: 160061. doi: 10.1098/rsob.160061

## Sheet: Supplementary Table 2
SUPPLEMENTARY TABLE 2 Primers used in this study.
Primer	Primer orientation	Sequence (5,-3,)	Restriction site	Description	Amplicon length (bp)
1	F	CCGCTCGAGTGATTGAGCAAGCTTTATGC	XhoI	Amplification of a 861-bp Spe promoter sequence with a mCherry coding sequence overhang (nucleotides ATGGTGAGCAAGGGCGAGGA) using pHP45 as a template; used for construction of pBBR1MCS-2-Spep-mCherry	887
2	R	TCCTCGCCCTTGCTCACCATGATGTTTAACTTTGTTTTAG
3	F	CTAAAACAAAGTTAAACATCATGGTGAGCAAGGGCGAGGA		Amplification of the mCherry coding sequence with a 20-bp Spe promoter overhang at the 5' end using mCherry plasmid DNA as a template; used for construction of pBBR1MCS-2-Spep-mCherry	737
4	R	CTAGTCTAGATTACTTGTACAGCTCGTCCATGC	XbaI
5	R	TCCTCGCCCTTCGAGACCATGATGTTTAACTTTGTTTTAG		Amplification of a 861-bp Spe promoter sequence with a mTFP1 coding sequence overhang (nucleotides ATGGTCTCGAAGGGCGAGGA) using pHP45 as a template (together with primer 1); used for construction of pBBR1MCS-2-Spep-mTFP1	887
6	F	CTAAAACAAAGTTAAACATCATGGTCTCGAAGGGCGAGGA		Amplification of the mTFP1 coding sequence with a 20-bp Spe promoter overhang at the 5' end using mTFP1 plasmid DNA as a template; used for construction of pBBR1MCS-2-Spep-mTFP1	737
7	R	CTAGTCTAGATTACTTATACAGCTCGTCC	XbaI
8	F	CGCGGATCCAGGCTTTCAATGCACAGAG	BamHI	Amplification of the MtCHIT5b promoter region from genomic DNA of M. truncatula R108; used for construction of pCAMBIA1305-MtCHIT5bp-GUS and pCAMBIA1302-MtCHIT5bp-GFP	3 033
9	R	CATGCCATGGGACAAAATCTAAATAATG	NcoI
10	F	CGGGGTACCAACATGGTGGAGCACGACAC	KpnI	Amplification of a 35S-RFP-polyA cassette using pCAMBIA1305-RFP as a template; used for construction of pCAMBIA1305-MtCHIT5bp-GUS+RFP and pCAMBIA1302-MtCHIT5bp-MtCHIT5b:GFP+RFP	1 332
11	R	CGGGGTACCACTGGATTTTGGTTTTAGG	KpnI
12	F	ATTTAGATTTTGTCCCATGGCTAACATCCTCAACCTGAAA	NcoI	Amplification of the MtCHIT5b coding sequence from genomic DNA of M. truncatula R108; used for construction of pCAMBIA1302-MtCHIT5bp-MtCHIT5b:GFP	1 143
13	R	ACTAGTCAGATCTACCATGGCCACAAGCTTCCAGGCTTTC	NcoI
14	F	CCTCTAGAGAATTCCCACATCATCATCATCAATC	XbaI-EcoRI	Amplification of a MtCHIT5b fragment from genomic DNA of M. truncatula R108; used for construction of pBS-RNAi-MtCHIT5bi	625 & 637
15	R	AGGGATCCCCCGGGCCGGTTTTATTACTCCG	BamHI-SmaI
16	F	CTAGTCTAGAATGGCTAACATCCTCAACCTG	XbaI	Amplification of the MtCHIT5b coding sequence from genomic DNA of M. truncatula R108; used for construction of pUB-MtCHIT5b	1 269
17	R	CGGGGTACCTCACACAAGCTTCCAGGCTTTCG	KpnI
18	R	TCCTCGCCCTTGCTCACCATCACAAGCTTCCAGGCTTTCG		Amplification of the MtCHIT5b coding sequence with a mCherry coding sequence overhang (nucleotides ATGGTGAGCAAGGGCGAGGA) using genomic DNA of M. truncatula R108 as a template (together with primer 16); used for construction of pUB-MtCHIT5b:mCherry	1 283
19	F	CGAAAGCCTGGAAGCTTGTGATGGTGAGCAAGGGCGAGGA		Amplification of the mCherry coding sequence with a 20-bp MtCHIT5b coding sequence overhang at the 5' end using pBBR1MCS-2-Spep-mCherry as a template, used for construction of pUB-MtCHIT5b:mCherry	734
20	R	CGGGGTACCCTTGTACAGCTCGTCCATGC	KpnI
21	F	CTATGACCATGATTACGAATTCGAGCTCGGAGAGAGGATTTTGAGG	SacI	Amplification of the MtCHIT5b overexpression cassette using pUB-MtCHIT5b as a template; used for construction of pCAMBIA1305-LjUbip-MtCHIT5b+RFP	2 780
22	R	CTCTAGAGGATCCCCGGGTACCGAGCTCGATCTAGTAACATAGATGAC	SacI
23	F	GCTATTGTATACCGTCCTTCTTAGCC		Detection of the nfh1-3b mutant	6 280
24	R	GACAAAATCTATATAATGTTTTGCTT
25	F	GAAATTTCATCTTCTCAAATCTTATCCC		Detection of the chit5b-2 mutant	5 746
26	R	TCGTTAATGGAATTAACCGGATACATCC
27	F	AATGTTAAGAATGTTGCCGTG		EF primers used for qRT-PCR with ecotype R108 and Jemalong A17	285
28	R	AACCATCTTAATGATACCAGC
29	F	GTTCCACAAGCACAACATCAC		MtNFH1 primers used for qRT-PCR with ecotype R108	189
30	R	AGGTGGCTACAGTTGTTGAATC
31	F	AGTGGAAGTACGTGGATCGGATACGATA		MtCHIT5b primers used for qRT-PCR with ecotype R108 and Jemalong A17	154
32	R	TCCAGGCTTTCGAAGCTTGAGTTGCGAT
33	F	TTCTTGTACTCACTAGGGTTAGTGTT		MtENOD11 primers used for qRT-PCR with ecotype R108	211
34	R	GAGGCTTGTAAGTAGGAGGAGGC
35	F	GTAAACATGGGCCGAGATCGTAC		MtCHIT5a primers used for qRT-PCR with ecotype R108	272
36	R	CTCCGCTCCCACCCCATTGACATTTG
37	F	TTCTTGTACTCGCTAGGGTTAGTGTT		MtENOD11 primers used for qRT-PCR with ecotype Jemalong A17	187
38	R	GAGGCTTGTAAGTAGGAGGAGGC
